# Supplementary material
Source: Springer Nature journal article supplement (https://www.springermedizin.de/resource/supplementary/12981_2011_218_MOESM1_ESM.pdf/9604080)
Supplement: MOESM1 [file 9604080]

812 patients started cART between January 2002 and December 2008

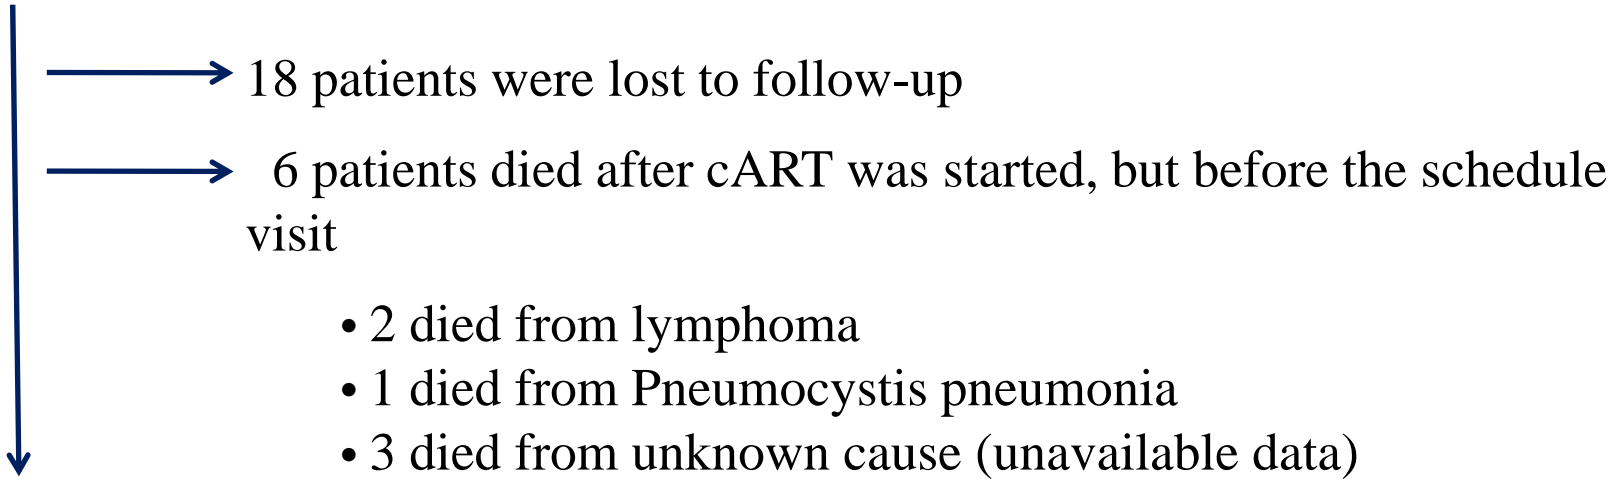

788 patients were included for baseline characteristics and virological analysis

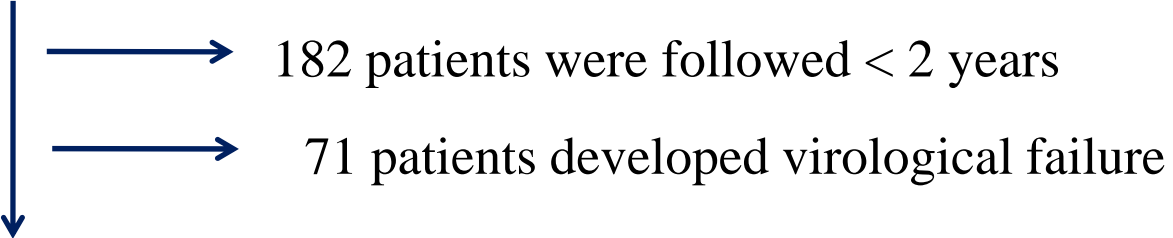

535 patients were included for immunological analysis
